# Supplementary material for: Development of a chemical ionization mass spectrometry system for measurement ofatmospheric OH radical
Source: Copernicus journal article supplement (doi:10.5194/amt-2020-252), 2020-07-13
Supplement: Supplementary file 1 [file amt-2020-252-supplement.pdf]

## Supplement

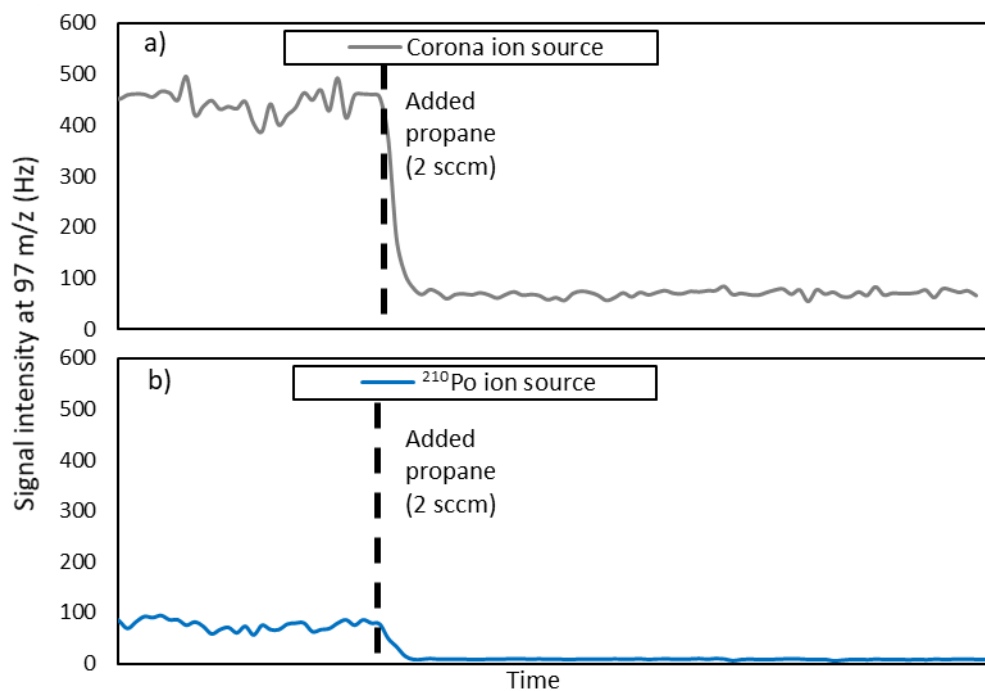

**Figure S1.** Signal intensity at 97 m/z when using a) corona and b) <sup>210</sup>Po as ion source. SO<sub>2</sub> flow rate was 5 sccm.

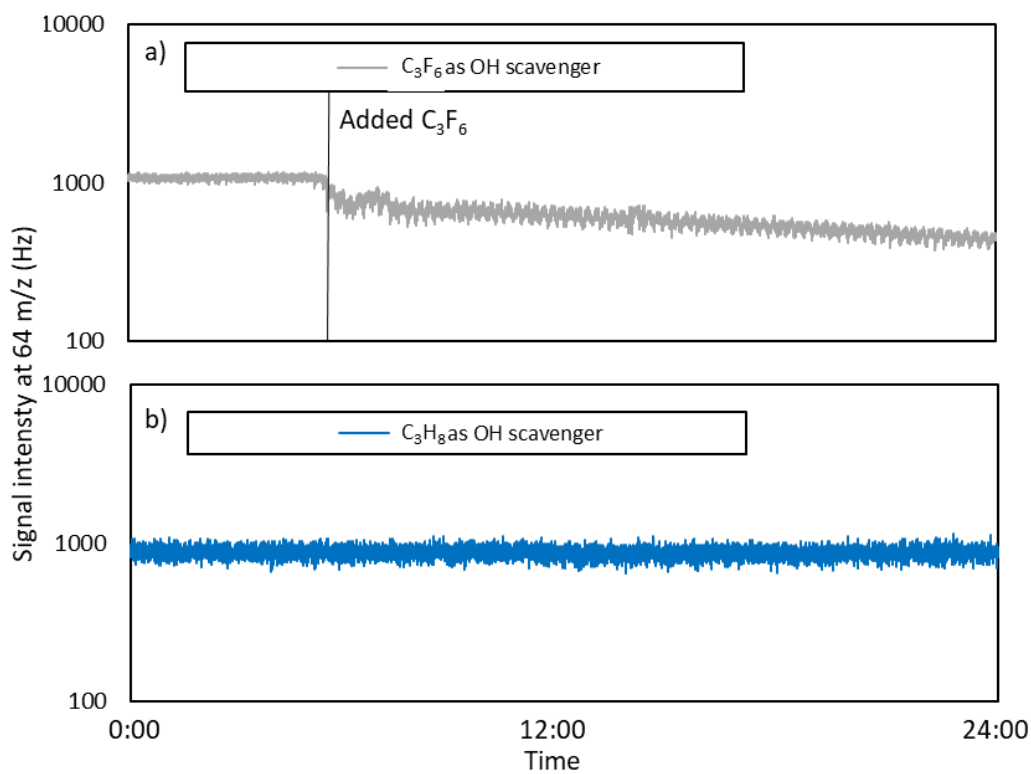

**Figure S2.** Signal intensity at 64 m/z when using a) C<sub>3</sub>F<sub>6</sub> and b) C<sub>3</sub>H<sub>8</sub> as OH scavenger.

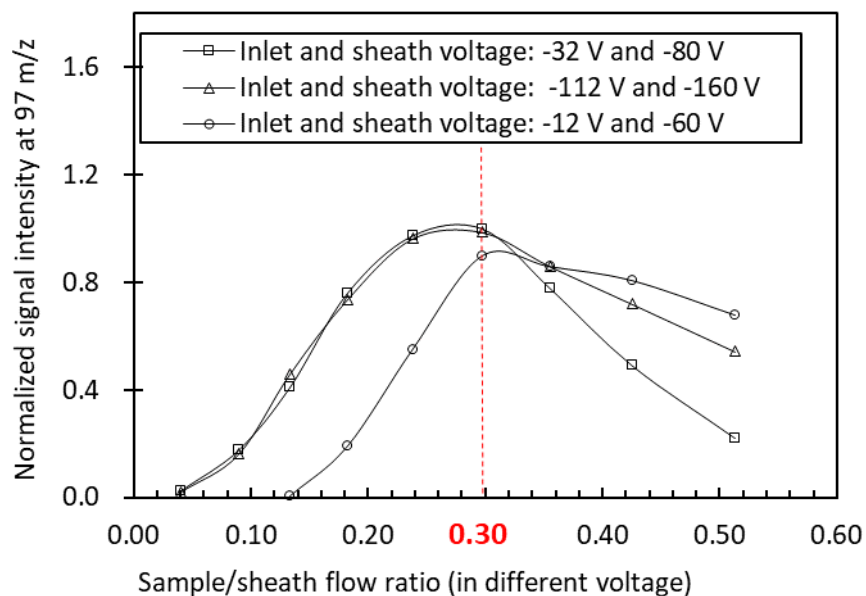

**Figure S3.** The normalized signal intensity at 97 m/z as a function of sample/sheath flow ratio at different voltages.

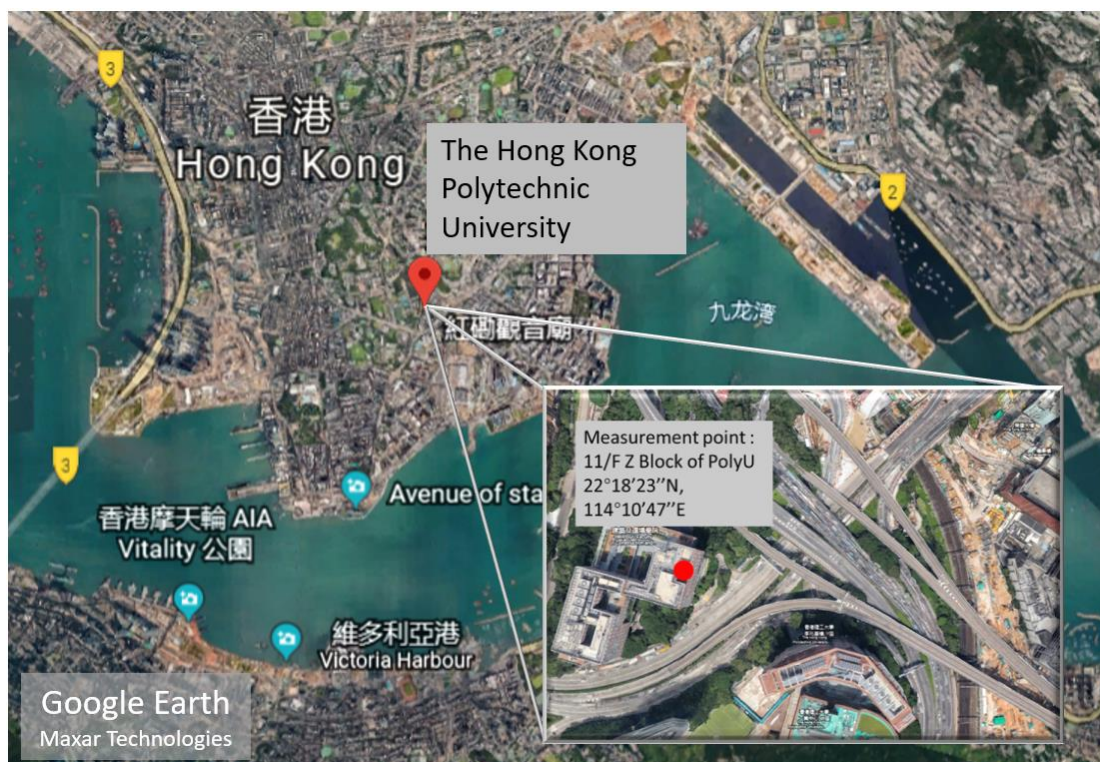

**Figure S4.** The map of ambient experiment location from the Google Earth (© Google Earth). The measurement site is labeled by red dot. The location is inside the Hong Kong Polytechnic University, around 50 m high above the ground and right next to the highway.
